# Supplementary material for: Social information affects Canada goose alert and escape responses to vehicle approach: implications for animal–vehicle collisions
Source: PeerJ. 2019 Dec 17;7:e8164. doi: 10.7717/peerj.8164 (PMC6924344; doi:10.7717/peerj.8164)
Supplement: Supplemental Information 1 [file peerj-07-8164-s001.xlsx]

## Sheet: Sheet1
date	run	direction	Companion grp Treat	Flushed from carrier (Y or N)	wind	temp	light	Approach time (s)	Approach time (s) adjusted	Video seconds elapsed at start of approach	Seconds elapsed at Alert	Seconds into approach at alert	Vehicle distance (m) into approach at alert	Remaining approach distance (m) at alert	Bird position (m) from end point of chute at alert	AD	Video seconds elapsed at flight	Seconds into approach at flight	Vehicle distance (m) into approach at flight	Remaining approach distance(m) at flight	FID	Escape summary (FLY, Step, None)	escapecode	Companion grp ID
2017-08-01	1	D	B	N	0	20.5	152.14	20	20	225.667	237.8	12.1333	152.273	98.7267	25	73.7267	238.533	12.8667	161.477	89.5233	64.5233	F	2	1
2017-08-01	2	D	B	N	0	20.6	590.2	20	20	239.333	250.367	11.0333	138.468	112.532	32.5	80.0317	253.067	13.7333	172.353	78.6467	46.1467	F	2	1
2017-08-01	3	D	B	N	0	21.4	538.3	19	19	123.3	131.533	8.23333	108.767	142.233	32.5	109.733	132.633	9.33333	123.298	127.702	95.2018	F	2	1
2017-08-01	4	D	B	N	0	22.6	734.2	19	19	56.4667	65.9333	9.46667	125.06	125.94	32.5	93.4404	66.0667	9.6	126.821	124.179	91.6789	F	2	1
2017-08-01	5	D	B	N	0	22.5	184.04	20	20	305.3	318.733	13.4333	168.588	82.4117	25	57.4117	319.6	14.3	179.465	71.535	46.535	F	2	1
2017-08-01	6	D	E	N	0	25.1	505.3	20	20	111.333	121.967	10.6333	133.448	117.552	25	92.5517	122.833	11.5	144.325	106.675	81.675	F	2	1
2017-08-01	7	D	E	N	0	24.5	369.5	20	20	86.2667	89.6333	3.36667	42.2517	208.748	27.5	181.248	98.6333	12.3667	155.202	95.7983	68.2983	F	2	1
2017-08-01	8	D	E	Y	0	23.9	188.29	19	19	274.067	282.533	8.46667	111.849	139.151	25	114.151	284.533	10.4667	138.27	112.73	87.7298	F	2	1
2017-08-01	9	D	E	N	0	23	368.8	20	20	77.7667	90.7	12.9333	162.313	88.6867	42.5	46.1867	90.9667	13.2	165.66	85.34	42.84	F	2	1
2017-08-01	10	D	E	N	0	24	165.27	21	21	112.2	119.733	7.53333	90.0413	160.959	12.5	148.459	127.8	15.6	186.457	64.5429	52.0429	F	2	1
2017-08-01	11	T	B	N	0	25.3	213.6	20	20	82.7333	87.7667	5.03333	63.1683	187.832	25	162.832	97.7667	15.0333	188.668	62.3317	37.3317	S	1	2
2017-08-01	12	T	B	Y	0	28.7	1138.7	20	20	234.5	0	.	.	.	.	0	0	.	.	.	0	N	0	2
2017-08-01	13	T	B	N	0	26.9	846	20	20	120.133	135.533	15.4	193.27	57.73	32.5	25.23	135.6	15.4667	194.107	56.8933	24.3933	S	1	2
2017-08-01	14	T	B	Y	0	28.7	1353.2	20	20	183.6	189.067	5.46667	68.6067	182.393	25	157.393	194.667	11.0667	138.887	112.113	87.1133	S	1	2
2017-08-01	15	T	B	N	0	26.5	1183	20	20	109.867	119.933	10.0667	126.337	124.663	32.5	92.1633	125.067	15.2	190.76	60.24	27.74	S	1	2
2017-08-01	16	T	E	Y	0	27	1106.6	20	20	174.6	180.467	5.86667	73.6267	177.373	32.5	144.873	182.633	8.03333	100.818	150.182	117.682	S	1	2
2017-08-01	17	T	E	N	0	27	1420	19	19	83.2	0	.	.	.	.	0	0	.	.	.	0	N	0	2
2017-08-01	18	T	E	N	2	27.2	1480.5	19	19	91.8	100.067	8.26667	109.207	141.793	25	116.793	103.833	12.0333	158.967	92.0333	67.0333	F	2	2
2017-08-01	19	T	E	N	0	29.3	1336.8	20	20	84.6667	88.9333	4.26667	53.5467	197.453	35	162.453	99.6667	15	188.25	62.75	27.75	S	1	2
2017-08-01	20	T	E	Y	2	29	1415.8	19	19	190.5	0	.	.	.	.	0	0	.	.	.	0	N	0	2
2017-08-02	21	T	B	N	3	22.3	243.1	19	19	117.233	127.267	10.0333	132.546	118.454	25	93.4544	131.6	14.3667	189.791	61.2088	36.2088	S	1	3
2017-08-02	22	T	B	N	3	22	279.4	20	20	78	91.3667	13.3667	167.752	83.2483	25	58.2483	0	.	.	.	0	N	0	3
2017-08-02	23	T	B	N	3	22.1	244.9	20	20	77.9667	86.2333	8.26667	103.747	147.253	27.5	119.753	0	.	.	.	0	N	0	3
2017-08-02	24	T	B	N	0	22.6	188.71	19	19	86	96.6333	10.6333	140.472	110.528	25	85.5281	100.6	14.6	192.874	58.1263	33.1263	S	1	3
2017-08-02	25	T	B	Y	0	22.2	154.84	19	19	214.467	219.033	4.56667	60.3281	190.672	25	165.672	226.833	12.3667	163.37	87.6298	62.6298	S	1	3
2017-08-02	26	T	E	N	0	21.4	150.58	20	20	81.9	87.5	5.6	70.28	180.72	45	135.72	91.6333	9.73333	122.153	128.847	83.8467	S	1	3
2017-08-02	27	T	E	Y	5	21.9	156.53	19	19	199.733	203.633	3.9	51.5211	199.479	32.5	166.979	212.167	12.4333	164.251	86.7491	54.2491	S	1	3
2017-08-02	28	T	E	N	4.6	22.1	672.1	20	20	63.8333	70.6667	6.83333	85.7583	165.242	35	130.242	0	.	.	.	0	N	0	3
2017-08-02	29	T	E	N	4.2	22.1	175.56	20	20	130.6	142.4	11.8	148.09	102.91	25	77.91	142.967	12.3667	155.202	95.7983	70.7983	S	1	3
2017-08-02	30	T	E	N	4.6	22.7	186.27	20	20	62.5667	71.0333	8.46667	106.257	144.743	27.5	117.243	75.7	13.1333	164.823	86.1767	58.6767	S	1	3
2017-08-02	31	D	B	N	3.5	24.9	626.4	20	20	129.7	139	9.3	116.715	134.285	37.5	96.785	142.833	13.1333	164.823	86.1767	48.6767	F	2	4
2017-08-02	32	D	B	N	3.5	24	249.3	20	20	112.4	116.2	3.8	47.69	203.31	25	178.31	123.9	11.5	144.325	106.675	81.675	F	2	4
2017-08-02	33	D	B	N	0	26	541.6	20	20	142.8	150.567	7.76667	97.4717	153.528	30	123.528	151.967	9.16667	115.042	135.958	105.958	F	2	4
2017-08-02	34	D	B	Y	6	25.4	239.7	20	20	177.533	182.333	4.8	60.24	190.76	25	165.76	191.133	13.6	170.68	80.32	55.32	F	2	4
2017-08-02	35	D	B	N	0	25.4	490.3	19	19	141.5	150.467	8.96667	118.454	132.546	15	117.546	152.533	11.0333	145.756	105.244	90.2439	S	1	4
2017-08-02	36	D	E	Y	1	25.3	212.8	19	19	86.4	95.1333	8.73333	115.372	135.628	20	115.628	99.9667	13.5667	179.223	71.7772	51.7772	F	2	4
2017-08-02	37	D	E	N	0	26.3	606.3	19	19	129.167	140.933	11.7667	155.444	95.5561	15	80.5561	142.733	13.5667	179.223	71.7772	56.7772	F	2	4
2017-08-02	38	D	E	N	0	26.2	1140.1	22	19.58	84.8	88.7333	3.93333	50.4249	200.575	35	165.575	98.0333	13.2333	169.65	81.3501	46.3501	F	2	4
2017-08-02	39	D	E	N	0	26.4	705.9	19	19	141.6	152.2	10.6	140.032	110.968	25	85.9684	154.433	12.8333	169.535	81.4649	56.4649	F	2	4
2017-08-02	40	D	E	N	0	26.3	271.7	20	20	147.1	155.6	8.5	106.675	144.325	12.5	131.825	161.633	14.5333	182.393	68.6067	56.1067	F	2	4
2017-08-03	41	D	E	N	2	21.2	244.5	21	19.56	271.9	284.433	12.5333	160.868	90.1318	35	55.1318	285.1	13.2	169.425	81.575	46.575	F	2	5
2017-08-03	42	D	E	N	4.4	20.6	198.27	20	20	66.9	77.8333	10.9333	137.213	113.787	25	88.7867	80.5	13.6	170.68	80.32	55.32	S	1	5
2017-08-03	43	D	E	N	2	21.3	144.11	20	20	65.6333	75.8	10.1667	127.592	123.408	25	98.4083	78.3667	12.7333	159.803	91.1967	66.1967	F	2	5
2017-08-03	44	D	E	N	1	21.5	190.54	20	20	73.0333	81.4667	8.43333	105.838	145.162	42.5	102.662	85.9667	12.9333	162.313	88.6867	46.1867	F	2	5
2017-08-03	45	D	E	N	2.8	21.9	377.3	19	19	219.567	227.133	7.56667	99.9596	151.04	27.5	123.54	230.067	10.5	138.711	112.289	84.7895	F	2	5
2017-08-03	46	D	B	N	0	21.8	478.5	19	19	192.333	194.767	2.43333	32.1456	218.854	27.5	191.354	198.2	5.86667	77.5018	173.498	145.998	F	2	5
2017-08-03	47	D	B	N	1.3	22.3	572.7	19	19	61.3	67.8	6.5	85.8684	165.132	35	130.132	74.4	13.1	173.058	77.9421	42.9421	F	2	5
2017-08-03	48	D	B	Y	5	22.5	720.6	20	19.56	348.3	358.167	9.86667	126.641	124.359	35	89.3591	359	10.7	137.337	113.663	78.6631	F	2	5
2017-08-03	49	D	B	N	1	22.6	641.9	19	19	34.5667	40.7	6.13333	81.0246	169.975	35	134.975	47.2	12.6333	166.893	84.107	49.107	F	2	5
2017-08-03	50	D	B	Y	0	22.3	717.3	20	20	230.733	241.4	10.6667	133.867	117.133	25	92.1333	245.467	14.7333	184.903	66.0967	41.0967	F	2	5
2017-08-03	51	T	E	N	2	23.6	291.3	19	19	167.1	170.733	3.63333	47.9982	203.002	27.5	175.502	176.133	9.03333	119.335	131.665	104.165	S	1	6
2017-08-03	52	T	E	N	2.3	23.3	373.3	21	21	147.533	149.433	1.9	22.7095	228.29	25	203.29	161.733	14.2	169.724	81.2762	56.2762	S	1	6
2017-08-03	53	T	E	N	0	23.9	356.5	20	20	63.3333	67.9667	4.63333	58.1483	192.852	22.5	170.352	76.3	12.9667	162.732	88.2683	65.7683	S	1	6
2017-08-03	54	T	E	N	3.4	23.9	525.6	20	20	71.5333	78.7	7.16667	89.9417	161.058	25	136.058	84.9667	13.4333	168.588	82.4117	57.4117	S	1	6
2017-08-03	55	T	E	N	2.1	23.9	464.4	19	19	55.2667	63.6667	8.4	110.968	140.032	30	110.032	68.1	12.8333	169.535	81.4649	51.4649	S	1	6
2017-08-03	56	T	B	N	3.2	24.5	384.3	20	20	69.6	81.1	11.5	144.325	106.675	25	81.675	84.1	14.5	181.975	69.025	44.025	S	1	6
2017-08-03	57	T	B	N	3.2	24.9	877	19	19	73.1	83.6333	10.5333	139.151	111.849	35	76.8491	83.7333	10.6333	140.472	110.528	75.5281	S	1	6
2017-08-03	58	T	B	N	5	24.4	861.2	20	20	67.2667	77.1333	9.86667	123.827	127.173	27.5	99.6733	81.0333	13.7667	172.772	78.2283	50.7283	S	1	6
2017-08-03	59	T	B	N	4.3	25.1	727.4	19	19	87.3333	91.8667	4.53333	59.8877	191.112	32.5	158.612	99.9	12.5667	166.012	84.9877	52.4877	S	1	6
2017-08-03	60	T	B	N	2	26.5	859.6	19	19	87.0333	96.6	9.56667	126.381	124.619	32.5	92.1193	100.767	13.7333	181.425	69.5754	37.0754	S	1	6
2017-08-04	61	T	E	N	0	21.7	138.32	20	20	123.7	128.833	5.13333	64.4233	186.577	32.5	154.077	0	.	.	.	0	N	0	7
2017-08-04	62	D	E	N	6.4	21.9	118.63	22	19.83	38.8667	42.2	3.33333	42.1849	208.815	27.5	181.315	53.6667	14.8	187.301	63.6992	36.1992	F	2	7
2017-08-04	63	T	E	N	6.5	21.8	47.29	20	20	48.7333	53.7667	5.03333	63.1683	187.832	17.5	170.332	62.6333	13.9	174.445	76.555	59.055	F	2	7
2017-08-04	64	D	E	N	8	21.1	38.03	20	20	58.9	70	11.1	139.305	111.695	35	76.695	72.3	13.4	168.17	82.83	47.83	S	1	7
2017-08-04	65	T	E	N	2.3	21.2	151.8	20	20	74.6333	84.4333	9.8	122.99	128.01	27.5	100.51	0	-74.6333	-936.648	1187.65	0	N	0	7
2017-08-04	66	D	E	N	3	21.1	155.8	20	20	32.4333	38.0333	5.6	70.28	180.72	25	155.72	47.9667	15.5333	194.943	56.0567	31.0567	S	1	7
2017-08-04	67	T	E	N	8	20.9	177.08	20	20	62.8	69.7667	6.96667	87.4317	163.568	25	138.568	71.1333	8.33333	104.583	146.417	121.417	S	1	7
2017-08-04	68	D	E	N	7	21.1	198.9	20	20	67.7667	79.2667	11.5	144.325	106.675	37.5	69.175	82	14.2333	178.628	72.3717	34.8717	S	1	7
2017-08-04	69	T	E	N	5.4	21.1	225.5	20	20	69.2333	0	.	.	.	.	0	0	.	.	.	0	N	0	7
2017-08-04	70	D	E	N	7	22.2	282.5	20	20	111.767	123.333	11.5667	145.162	105.838	25	80.8383	123.733	11.9667	150.182	100.818	75.8183	S	1	7
2017-08-04	71	T	B	Y	14	21.9	596.7	20	20	159.833	173.033	13.2	165.66	85.34	35	50.34	173.033	13.2	165.66	85.34	50.34	S	1	8
2017-08-04	72	D	B	N	7	21.4	446.2	19	19	68.9	79.3667	10.4667	138.27	112.73	25	87.7298	80.7333	11.8333	156.325	94.6754	69.6754	F	2	8
2017-08-04	73	T	B	N	8.5	23.7	387.4	19	19	73.2667	81.4667	8.2	108.326	142.674	20	122.674	86.9333	13.6667	180.544	70.4561	50.4561	F	2	8
2017-08-04	74	D	B	N	7	22.6	470.6	21	21	65.1	73.2333	8.13333	97.2127	153.787	25	128.787	77.8667	12.7667	152.592	98.4079	73.4079	S	1	8
2017-08-04	75	T	B	Y	8	24.5	521.4	20	20	104.733	119.1	14.3667	180.302	70.6983	25	45.6983	119.1	14.3667	180.302	70.6983	45.6983	S	1	8
2017-08-04	76	D	B	N	7	22.9	126.65	20	20	68.4667	76.0333	7.56667	94.9617	156.038	35	121.038	79.5	11.0333	138.468	112.532	77.5317	F	2	8
2017-08-04	77	T	B	N	10	22.4	143.41	20	20	57.4667	0	.	.	.	.	0	0	.	.	.	0	N	0	8
2017-08-04	78	D	B	N	3	22.3	96.23	20	20	186.167	193.767	7.6	95.38	155.62	25	130.62	197.5	11.3333	142.233	108.767	83.7667	F	2	8
2017-08-04	79	T	B	N	3	22.4	90.63	19	19	43.2	54.4333	11.2333	148.398	102.602	22.5	80.1018	56.1333	12.9333	170.856	80.1439	57.6439	F	2	8
2017-08-04	80	D	B	Y	3	22.4	110.72	19	19	77.8	81.6	3.8	50.2	200.8	25	175.8	92.6667	14.8667	196.396	54.6035	29.6035	S	1	8
										Mean Run time:	Treat	Uncorrected	SD	corrected
											DB	19.65	0.587143	19.6696
											DE	20.0526	0.911268	19.7496
											Mean	19.8513
											SE	0.284704
